# Supplementary material for: Biodegradable and wood adhesive polyesters based on lignin-derived 2-pyrone-4,6-dicarboxylic acid
Source: Royal Society of Chemistry journal article supplement (doi:10.1039/d4su00163j), 2024-01-01
Supplement: d4su00163j1.pdf [file d4su00163j1.pdf]

# Supporting Information

## Biodegradable and Wood Adhesive Polyesters Based on Lignin- Derived 2-Pyrone-4,6-dicarboxylic Acid

*Yijie Jin,<sup>a</sup> Takuma Araki,<sup>b</sup> Naofumi Kamimura,<sup>c</sup> Eiji Masai,<sup>c</sup> Masaya Nakamura,<sup>b</sup> and  
Tsuyoshi Michinobu<sup>a,\*</sup>*

<sup>a</sup> Department of Materials Science and Engineering, Tokyo Institute of Technology,  
2-12-1 Ookayama, Meguro-ku, Tokyo 152-8552, Japan

<sup>b</sup> Department of Forest Resource Chemistry, Forestry and Forest Products Research  
Institute, Tsukuba 305-8687, Japan

<sup>c</sup> Department of Materials Science and Bioengineering, Nagaoka University of  
Technology, Nagaoka 940-2188

\*Corresponding author. E-mail: michinobu.t.aa@m.titech.ac.jp

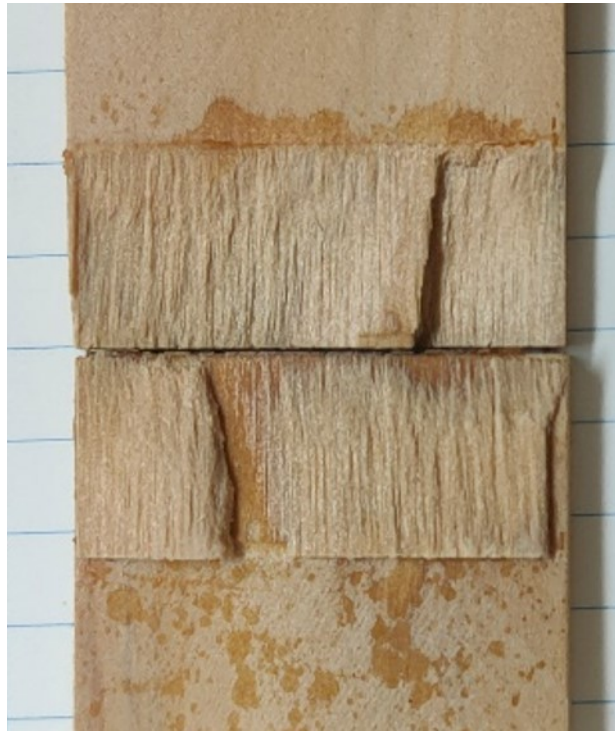

**Figure S1.** Cypress fractured by shear forces.

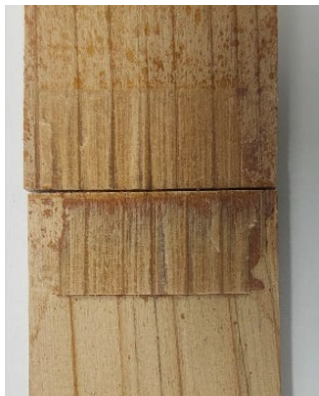

**No accelerated  
deterioration treatment**

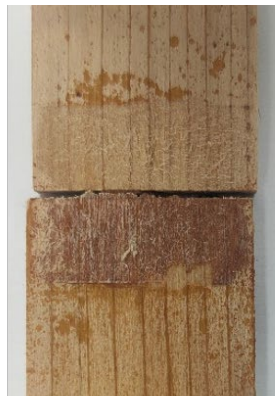

**Soak in DI water at  
60 °C for 3 h  
→ soak in DI water  
at 20 °C for 10 min**

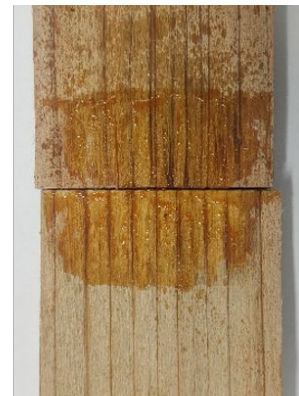

**Soak in boiling DI  
water for 4 h  
→ soak in DI water  
at 60 °C for 20 h  
→ soak in boiling DI  
water for 4 h  
→ soak in DI water  
at 20 °C for 10 min**

**Figure S2.** Changes of P(PDC3) under different accelerated deterioration treatments.

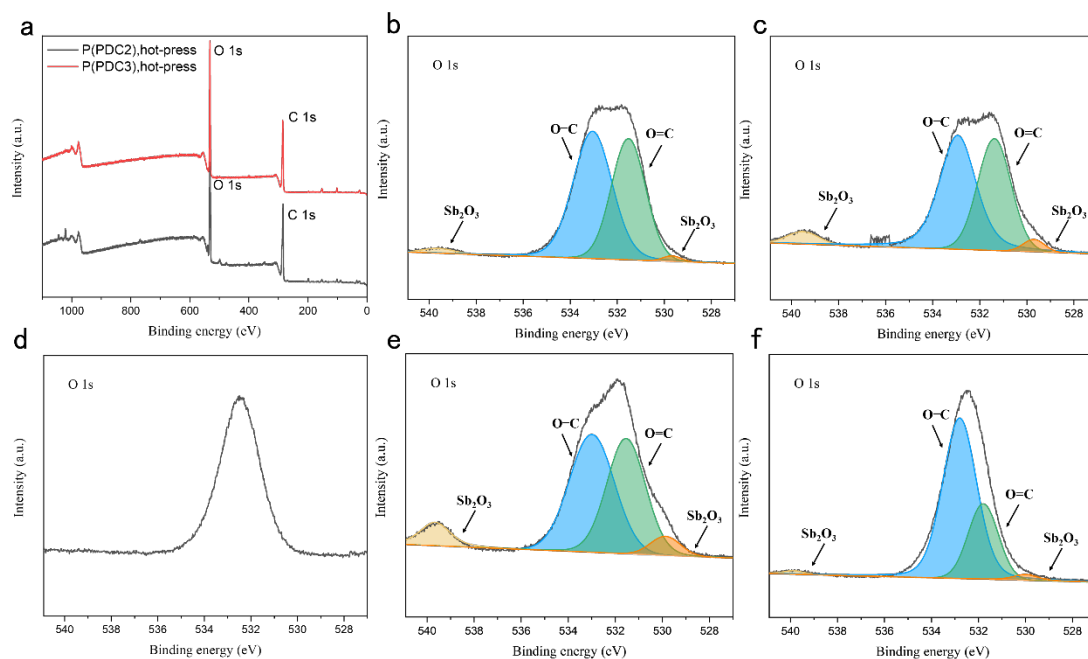

**Figure S3.** (a) XPS survey spectra of P(PDC2) and P(PDC3) after hot-pressing, (b) O 1s core-level spectrum of P(PDC2), (c) O 1s core-level spectrum of P(PDC3), (d) O 1s core-level spectrum of cypress wood plate, (e) O 1s core-level spectrum of P(PDC2) after hot-pressing, (f) O 1s core-level spectrum of P(PDC3) after hot-pressing.

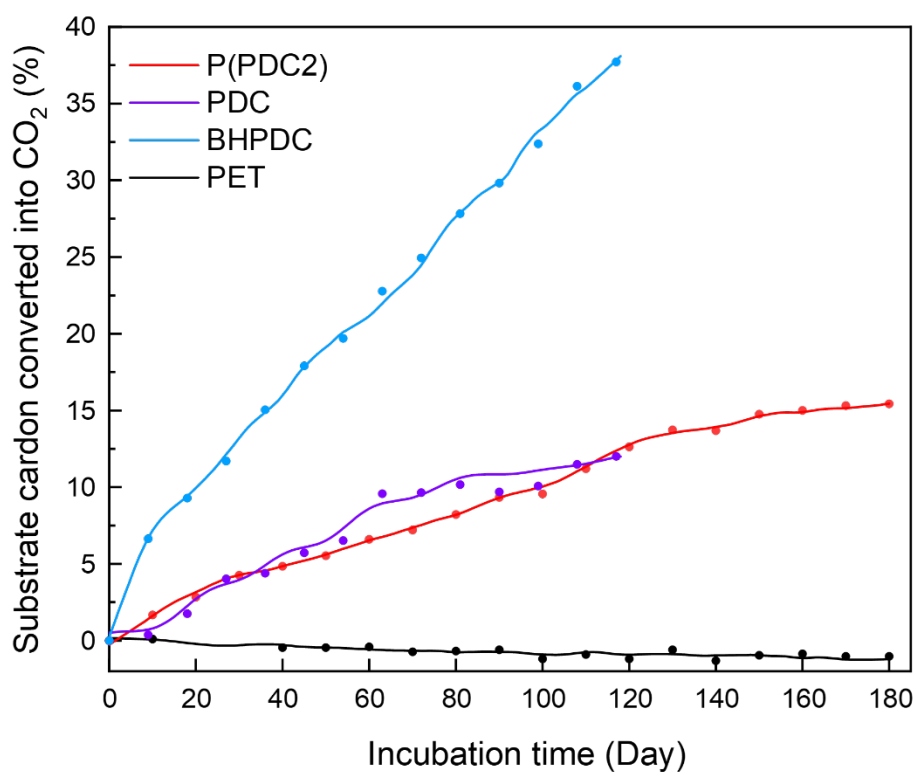

**Figure S4.** Biodegradation rates of P(PDC2), PDC, BHPDC and PET in pure pond water for 120 days or 180 days. Average plots of two test samples.
